# Supplementary material
Source: publisher figshare collection journal article supplement (https://acs.figshare.com/ndownloader/files/3954646)
Supplement: Supplementary file 1 [file 3954646]

 
data_C12-QNDT-CN  
 
_audit_creation_method            SHELXL-97 
_chemical_name_systematic 
; 
 ? 
; 
_chemical_name_common             C12-QNDT-CN 
_chemical_melting_point           ? 
_chemical_formula_moiety          'C44 H54 N4 S2' 
_chemical_formula_sum 
 'C44 H54 N4 S2' 
_chemical_formula_weight          703.03 
 
loop_ 
 _atom_type_symbol 
 _atom_type_description 
 _atom_type_scat_dispersion_real 
 _atom_type_scat_dispersion_imag 
 _atom_type_scat_source 
 'C'  'C'   0.0181   0.0091 
 'International Tables Vol C Tables 4.2.6.8 and 6.1.1.4' 
 'H'  'H'   0.0000   0.0000 
 'International Tables Vol C Tables 4.2.6.8 and 6.1.1.4' 
 'N'  'N'   0.0311   0.0180 
 'International Tables Vol C Tables 4.2.6.8 and 6.1.1.4' 
 'S'  'S'   0.3331   0.5567 
 'International Tables Vol C Tables 4.2.6.8 and 6.1.1.4' 
 
_symmetry_cell_setting            'Triclinic' 
_symmetry_space_group_name_H-M    P-1 
 
loop_ 
 _symmetry_equiv_pos_as_xyz 
 'x, y, z' 
 '-x, -y, -z' 
 
_cell_length_a                    4.62000(10) 
_cell_length_b                    14.0234(3) 
_cell_length_c                    15.5359(4) 
_cell_angle_alpha                 99.0404(15) 
_cell_angle_beta                  95.4568(14) 
_cell_angle_gamma                 99.291(2) 
_cell_volume                      973.48(4) 
_cell_formula_units_Z             1 
_cell_measurement_temperature     99(2) 
_cell_measurement_reflns_used     ? 
_cell_measurement_theta_min       3.81 
_cell_measurement_theta_max       68.20 
 
_exptl_crystal_description        'Platelet' 
_exptl_crystal_colour             'Red' 
_exptl_crystal_size_max           0.40 
_exptl_crystal_size_mid           0.20 
_exptl_crystal_size_min           0.01 
_exptl_crystal_density_meas       ? 
_exptl_crystal_density_diffrn     1.199 
_exptl_crystal_density_method     'not measured' 
_exptl_crystal_F_000              378 
_exptl_absorpt_coefficient_mu     1.502 
_exptl_absorpt_correction_type    'Multi-scan' 
_exptl_absorpt_correction_T_min   0.5849 
_exptl_absorpt_correction_T_max   0.9851 
_exptl_absorpt_process_details    'Jacobson, R. (1998) Private communication' 
 
_exptl_special_details 
; 
 ? 
; 
 
_diffrn_ambient_temperature       99(2) 
_diffrn_radiation_wavelength      1.54187 
_diffrn_radiation_type            CuK\a 
_diffrn_radiation_source          'fine-focus sealed tube' 
_diffrn_radiation_monochromator   graphite 
_diffrn_measurement_device_type   ? 
_diffrn_measurement_method        ? 
_diffrn_detector_area_resol_mean  ? 
_diffrn_standards_number          ? 
_diffrn_standards_interval_count  ? 
_diffrn_standards_interval_time   ? 
_diffrn_standards_decay_%         ? 
_diffrn_reflns_number             10337 
_diffrn_reflns_av_R_equivalents   0.0749 
_diffrn_reflns_av_sigmaI/netI     0.1108 
_diffrn_reflns_limit_h_min        -5 
_diffrn_reflns_limit_h_max        5 
_diffrn_reflns_limit_k_min        -16 
_diffrn_reflns_limit_k_max        16 
_diffrn_reflns_limit_l_min        -18 
_diffrn_reflns_limit_l_max        18 
_diffrn_reflns_theta_min          3.24 
_diffrn_reflns_theta_max          68.24 
_reflns_number_total              3484 
_reflns_number_gt                 2151 
_reflns_threshold_expression      >2sigma(I) 
 
_computing_data_collection        ? 
_computing_cell_refinement        ? 
_computing_data_reduction         ? 
_computing_structure_solution     'SHELXS-97 (Sheldrick, 1990)' 
_computing_structure_refinement   'SHELXL-97 (Sheldrick, 1997)' 
_computing_molecular_graphics     ? 
_computing_publication_material   ? 
 
_refine_special_details 
; 
 Refinement of F^2^ against ALL reflections.  The weighted R-factor wR and 
 goodness of fit S are based on F^2^, conventional R-factors R are based 
 on F, with F set to zero for negative F^2^. The threshold expression of 
 F^2^ > 2sigma(F^2^) is used only for calculating R-factors(gt) etc. and is 
 not relevant to the choice of reflections for refinement.  R-factors based 
 on F^2^ are statistically about twice as large as those based on F, and R- 
 factors based on ALL data will be even larger. 
; 
 
_refine_ls_structure_factor_coef  Fsqd  
_refine_ls_matrix_type            full 
_refine_ls_weighting_scheme       calc  
_refine_ls_weighting_details 
 'calc w=1/[\s^2^(Fo^2^)+(0.1076P)^2^+0.0000P] where P=(Fo^2^+2Fc^2^)/3' 
_atom_sites_solution_primary      direct 
_atom_sites_solution_secondary    difmap 
_atom_sites_solution_hydrogens    geom 
_refine_ls_hydrogen_treatment     mixed 
_refine_ls_extinction_method      none 
_refine_ls_extinction_coef        ? 
_refine_ls_number_reflns          3484 
_refine_ls_number_parameters      227 
_refine_ls_number_restraints      0 
_refine_ls_R_factor_all           0.1009 
_refine_ls_R_factor_gt            0.0692 
_refine_ls_wR_factor_ref          0.2009 
_refine_ls_wR_factor_gt           0.1628 
_refine_ls_goodness_of_fit_ref    0.965 
_refine_ls_restrained_S_all       0.965 
_refine_ls_shift/su_max           0.000 
_refine_ls_shift/su_mean          0.000 
 
loop_ 
 _atom_site_label 
 _atom_site_type_symbol 
 _atom_site_fract_x 
 _atom_site_fract_y 
 _atom_site_fract_z 
 _atom_site_U_iso_or_equiv 
 _atom_site_adp_type 
 _atom_site_occupancy 
 _atom_site_symmetry_multiplicity 
 _atom_site_calc_flag 
 _atom_site_refinement_flags 
 _atom_site_disorder_assembly 
 _atom_site_disorder_group 
S1 S 0.72952(19) 0.33891(5) 0.12293(6) 0.0321(3) Uani 1 1 d . . . 
C1 C 0.5921(7) 0.4865(2) 0.0343(2) 0.0296(8) Uani 1 1 d . . . 
C26 C 0.8156(9) 0.1532(2) 0.1870(3) 0.0364(9) Uani 1 1 d . . . 
C27 C 0.1788(7) 0.4408(2) -0.0879(2) 0.0313(8) Uani 1 1 d . . . 
H26 H 0.0604 0.4604 -0.1330 0.038 Uiso 1 1 calc R . . 
C5 C 0.5155(7) 0.2236(2) 0.0844(2) 0.0287(8) Uani 1 1 d . . . 
C6 C 0.0031(7) 0.2025(2) -0.2050(2) 0.0317(8) Uani 1 1 d . . . 
H1 H 0.1166 0.2422 -0.2420 0.038 Uiso 1 1 calc R . . 
H2 H 0.1399 0.1668 -0.1755 0.038 Uiso 1 1 calc R . . 
C7 C -0.2585(8) -0.1056(2) -0.4389(2) 0.0325(8) Uani 1 1 d . . . 
H3 H -0.1064 -0.1324 -0.4055 0.039 Uiso 1 1 calc R . . 
H4 H -0.1621 -0.0728 -0.4834 0.039 Uiso 1 1 calc R . . 
C8 C 0.3073(7) 0.3172(2) -0.0087(2) 0.0291(8) Uani 1 1 d . . . 
C9 C -0.3843(8) -0.2652(2) -0.5490(2) 0.0349(9) Uani 1 1 d . . . 
H5 H -0.2245 -0.2896 -0.5167 0.042 Uiso 1 1 calc R . . 
H6 H -0.2979 -0.2324 -0.5950 0.042 Uiso 1 1 calc R . . 
C10 C 0.5354(7) 0.3891(2) 0.0455(2) 0.0277(8) Uani 1 1 d . . . 
C11 C 0.1234(7) 0.3459(2) -0.0772(2) 0.0289(8) Uani 1 1 d . . . 
C12 C 0.2965(8) 0.2251(2) 0.0152(2) 0.0323(8) Uani 1 1 d . . . 
H27 H 0.1557 0.1689 -0.0124 0.039 Uiso 1 1 calc R . . 
C13 C -0.1294(8) 0.0512(2) -0.3252(2) 0.0319(8) Uani 1 1 d . . . 
H7 H -0.0196 0.0837 -0.3675 0.038 Uiso 1 1 calc R . . 
H8 H 0.0109 0.0212 -0.2906 0.038 Uiso 1 1 calc R . . 
C14 C -0.1148(8) 0.2708(2) -0.1355(2) 0.0321(8) Uani 1 1 d . . . 
H9 H -0.2541 0.3054 -0.1653 0.039 Uiso 1 1 calc R . . 
H10 H -0.2266 0.2307 -0.0984 0.039 Uiso 1 1 calc R . . 
C15 C -0.3726(7) -0.0297(2) -0.3761(2) 0.0328(8) Uani 1 1 d . . . 
H11 H -0.5150 0.0003 -0.4100 0.039 Uiso 1 1 calc R . . 
H12 H -0.4801 -0.0632 -0.3339 0.039 Uiso 1 1 calc R . . 
C16 C 0.5693(8) 0.1430(2) 0.1211(2) 0.0329(8) Uani 1 1 d . . . 
C17 C -0.2424(7) 0.1285(2) -0.2634(2) 0.0319(8) Uani 1 1 d . . . 
H13 H -0.3635 0.1641 -0.2987 0.038 Uiso 1 1 calc R . . 
H14 H -0.3720 0.0952 -0.2258 0.038 Uiso 1 1 calc R . . 
C18 C -0.6214(8) -0.3526(2) -0.5931(2) 0.0369(9) Uani 1 1 d . . . 
H15 H -0.7821 -0.3281 -0.6249 0.044 Uiso 1 1 calc R . . 
H16 H -0.7066 -0.3857 -0.5471 0.044 Uiso 1 1 calc R . . 
N2 N 1.0205(8) 0.1660(2) 0.2381(2) 0.0459(9) Uani 1 1 d . . . 
N1 N 0.2410(7) -0.0274(2) 0.0729(2) 0.0469(9) Uani 1 1 d . . . 
C21 C 0.3863(8) 0.0480(2) 0.0939(2) 0.0359(9) Uani 1 1 d . . . 
C22 C -0.4980(8) -0.1904(2) -0.4859(2) 0.0358(9) Uani 1 1 d . . . 
H17 H -0.5929 -0.2237 -0.4415 0.043 Uiso 1 1 calc R . . 
H18 H -0.6512 -0.1636 -0.5188 0.043 Uiso 1 1 calc R . . 
C23 C -0.7332(9) -0.5193(3) -0.6953(3) 0.0447(10) Uani 1 1 d . . . 
H19 H -0.6564 -0.5567 -0.7449 0.054 Uiso 1 1 calc R . . 
H20 H -0.9168 -0.4996 -0.7189 0.054 Uiso 1 1 calc R . . 
C24 C -0.5086(8) -0.4281(2) -0.6576(3) 0.0413(10) Uani 1 1 d . . . 
H21 H -0.4410 -0.3965 -0.7066 0.050 Uiso 1 1 calc R . . 
H22 H -0.3351 -0.4477 -0.6272 0.050 Uiso 1 1 calc R . . 
C25 C -0.8073(11) -0.5857(3) -0.6299(3) 0.0638(13) Uani 1 1 d . . . 
H23 H -0.6291 -0.6088 -0.6086 0.096 Uiso 1 1 calc R . . 
H24 H -0.9582 -0.6421 -0.6583 0.096 Uiso 1 1 calc R . . 
H25 H -0.8829 -0.5494 -0.5803 0.096 Uiso 1 1 calc R . . 
 
loop_ 
 _atom_site_aniso_label 
 _atom_site_aniso_U_11 
 _atom_site_aniso_U_22 
 _atom_site_aniso_U_33 
 _atom_site_aniso_U_23 
 _atom_site_aniso_U_13 
 _atom_site_aniso_U_12 
S1 0.0382(5) 0.0185(4) 0.0374(6) 0.0012(4) 0.0048(4) 0.0019(4) 
C1 0.031(2) 0.0230(17) 0.036(2) 0.0039(15) 0.0133(16) 0.0046(14) 
C26 0.043(2) 0.0230(18) 0.043(2) 0.0054(16) 0.009(2) 0.0041(16) 
C27 0.035(2) 0.0227(17) 0.034(2) -0.0018(15) 0.0061(17) 0.0027(15) 
C5 0.034(2) 0.0204(17) 0.031(2) 0.0034(14) 0.0059(16) 0.0019(14) 
C6 0.0308(19) 0.0242(17) 0.036(2) -0.0009(15) 0.0057(16) -0.0005(14) 
C7 0.0320(19) 0.0250(18) 0.039(2) 0.0035(15) 0.0023(17) 0.0047(15) 
C8 0.035(2) 0.0208(16) 0.031(2) 0.0013(14) 0.0096(16) 0.0038(14) 
C9 0.033(2) 0.0296(19) 0.040(2) 0.0014(16) 0.0011(17) 0.0044(15) 
C10 0.0335(19) 0.0150(15) 0.033(2) -0.0022(14) 0.0122(16) 0.0024(13) 
C11 0.0325(19) 0.0217(17) 0.032(2) -0.0013(15) 0.0119(16) 0.0036(14) 
C12 0.036(2) 0.0206(17) 0.039(2) 0.0005(15) 0.0110(17) 0.0015(14) 
C13 0.035(2) 0.0218(17) 0.037(2) 0.0017(15) 0.0054(17) 0.0022(15) 
C14 0.038(2) 0.0209(17) 0.035(2) -0.0005(15) 0.0060(17) 0.0016(15) 
C15 0.032(2) 0.0237(18) 0.040(2) 0.0021(16) 0.0046(17) 0.0029(15) 
C16 0.040(2) 0.0241(18) 0.034(2) 0.0041(15) 0.0083(17) 0.0040(15) 
C17 0.034(2) 0.0214(17) 0.040(2) 0.0010(15) 0.0085(17) 0.0050(14) 
C18 0.036(2) 0.0281(19) 0.044(2) 0.0014(17) 0.0037(18) 0.0045(16) 
N2 0.052(2) 0.0366(18) 0.051(2) 0.0115(16) 0.0050(18) 0.0097(16) 
N1 0.061(2) 0.0282(17) 0.046(2) 0.0070(15) 0.0004(18) -0.0037(16) 
C21 0.045(2) 0.0231(18) 0.038(2) 0.0041(16) 0.0047(18) 0.0015(16) 
C22 0.037(2) 0.0241(18) 0.042(2) -0.0028(16) 0.0049(17) 0.0011(15) 
C23 0.047(2) 0.0276(19) 0.054(3) -0.0077(18) 0.005(2) 0.0038(17) 
C24 0.045(2) 0.0275(19) 0.048(2) -0.0050(17) 0.0095(19) 0.0068(17) 
C25 0.078(3) 0.032(2) 0.072(3) -0.001(2) 0.000(3) -0.002(2) 
 
_geom_special_details 
; 
 All esds (except the esd in the dihedral angle between two l.s. planes) 
 are estimated using the full covariance matrix.  The cell esds are taken 
 into account individually in the estimation of esds in distances, angles 
 and torsion angles; correlations between esds in cell parameters are only 
 used when they are defined by crystal symmetry.  An approximate (isotropic) 
 treatment of cell esds is used for estimating esds involving l.s. planes. 
; 
 
loop_ 
 _geom_bond_atom_site_label_1 
 _geom_bond_atom_site_label_2 
 _geom_bond_distance 
 _geom_bond_site_symmetry_2 
 _geom_bond_publ_flag 
S1 C10 1.736(3) . ? 
S1 C5 1.737(3) . ? 
C1 C10 1.390(4) . ? 
C1 C1 1.435(7) 2_665 ? 
C1 C27 1.439(4) 2_665 ? 
C26 N2 1.147(5) . ? 
C26 C16 1.429(5) . ? 
C27 C11 1.354(4) . ? 
C27 C1 1.439(4) 2_665 ? 
C27 H26 0.9500 . ? 
C5 C16 1.390(4) . ? 
C5 C12 1.409(5) . ? 
C6 C17 1.521(4) . ? 
C6 C14 1.529(4) . ? 
C6 H1 0.9900 . ? 
C6 H2 0.9900 . ? 
C7 C15 1.522(4) . ? 
C7 C22 1.523(4) . ? 
C7 H3 0.9900 . ? 
C7 H4 0.9900 . ? 
C8 C12 1.393(4) . ? 
C8 C10 1.435(4) . ? 
C8 C11 1.446(5) . ? 
C9 C22 1.513(5) . ? 
C9 C18 1.527(5) . ? 
C9 H5 0.9900 . ? 
C9 H6 0.9900 . ? 
C11 C14 1.509(5) . ? 
C12 H27 0.9500 . ? 
C13 C15 1.520(4) . ? 
C13 C17 1.524(4) . ? 
C13 H7 0.9900 . ? 
C13 H8 0.9900 . ? 
C14 H9 0.9900 . ? 
C14 H10 0.9900 . ? 
C15 H11 0.9900 . ? 
C15 H12 0.9900 . ? 
C16 C21 1.434(5) . ? 
C17 H13 0.9900 . ? 
C17 H14 0.9900 . ? 
C18 C24 1.530(4) . ? 
C18 H15 0.9900 . ? 
C18 H16 0.9900 . ? 
N1 C21 1.139(4) . ? 
C22 H17 0.9900 . ? 
C22 H18 0.9900 . ? 
C23 C24 1.509(5) . ? 
C23 C25 1.509(5) . ? 
C23 H19 0.9900 . ? 
C23 H20 0.9900 . ? 
C24 H21 0.9900 . ? 
C24 H22 0.9900 . ? 
C25 H23 0.9800 . ? 
C25 H24 0.9800 . ? 
C25 H25 0.9800 . ? 
 
loop_ 
 _geom_angle_atom_site_label_1 
 _geom_angle_atom_site_label_2 
 _geom_angle_atom_site_label_3 
 _geom_angle 
 _geom_angle_site_symmetry_1 
 _geom_angle_site_symmetry_3 
 _geom_angle_publ_flag 
C10 S1 C5 91.06(15) . . ? 
C10 C1 C1 116.9(4) . 2_665 ? 
C10 C1 C27 123.1(3) . 2_665 ? 
C1 C1 C27 119.9(4) 2_665 2_665 ? 
N2 C26 C16 176.2(4) . . ? 
C11 C27 C1 123.3(3) . 2_665 ? 
C11 C27 H26 118.4 . . ? 
C1 C27 H26 118.4 2_665 . ? 
C16 C5 C12 127.2(3) . . ? 
C16 C5 S1 120.7(3) . . ? 
C12 C5 S1 112.1(2) . . ? 
C17 C6 C14 112.5(3) . . ? 
C17 C6 H1 109.1 . . ? 
C14 C6 H1 109.1 . . ? 
C17 C6 H2 109.1 . . ? 
C14 C6 H2 109.1 . . ? 
H1 C6 H2 107.8 . . ? 
C15 C7 C22 113.8(3) . . ? 
C15 C7 H3 108.8 . . ? 
C22 C7 H3 108.8 . . ? 
C15 C7 H4 108.8 . . ? 
C22 C7 H4 108.8 . . ? 
H3 C7 H4 107.7 . . ? 
C12 C8 C10 111.6(3) . . ? 
C12 C8 C11 128.8(3) . . ? 
C10 C8 C11 119.6(3) . . ? 
C22 C9 C18 113.8(3) . . ? 
C22 C9 H5 108.8 . . ? 
C18 C9 H5 108.8 . . ? 
C22 C9 H6 108.8 . . ? 
C18 C9 H6 108.8 . . ? 
H5 C9 H6 107.7 . . ? 
C1 C10 C8 122.6(3) . . ? 
C1 C10 S1 125.4(3) . . ? 
C8 C10 S1 111.9(2) . . ? 
C27 C11 C8 117.6(3) . . ? 
C27 C11 C14 122.2(3) . . ? 
C8 C11 C14 120.2(3) . . ? 
C8 C12 C5 113.2(3) . . ? 
C8 C12 H27 123.4 . . ? 
C5 C12 H27 123.4 . . ? 
C15 C13 C17 113.7(3) . . ? 
C15 C13 H7 108.8 . . ? 
C17 C13 H7 108.8 . . ? 
C15 C13 H8 108.8 . . ? 
C17 C13 H8 108.8 . . ? 
H7 C13 H8 107.7 . . ? 
C11 C14 C6 113.7(3) . . ? 
C11 C14 H9 108.8 . . ? 
C6 C14 H9 108.8 . . ? 
C11 C14 H10 108.8 . . ? 
C6 C14 H10 108.8 . . ? 
H9 C14 H10 107.7 . . ? 
C13 C15 C7 113.4(3) . . ? 
C13 C15 H11 108.9 . . ? 
C7 C15 H11 108.9 . . ? 
C13 C15 H12 108.9 . . ? 
C7 C15 H12 108.9 . . ? 
H11 C15 H12 107.7 . . ? 
C5 C16 C26 119.8(3) . . ? 
C5 C16 C21 121.9(3) . . ? 
C26 C16 C21 118.3(3) . . ? 
C6 C17 C13 113.5(3) . . ? 
C6 C17 H13 108.9 . . ? 
C13 C17 H13 108.9 . . ? 
C6 C17 H14 108.9 . . ? 
C13 C17 H14 108.9 . . ? 
H13 C17 H14 107.7 . . ? 
C9 C18 C24 114.1(3) . . ? 
C9 C18 H15 108.7 . . ? 
C24 C18 H15 108.7 . . ? 
C9 C18 H16 108.7 . . ? 
C24 C18 H16 108.7 . . ? 
H15 C18 H16 107.6 . . ? 
N1 C21 C16 179.5(4) . . ? 
C9 C22 C7 113.6(3) . . ? 
C9 C22 H17 108.8 . . ? 
C7 C22 H17 108.8 . . ? 
C9 C22 H18 108.8 . . ? 
C7 C22 H18 108.8 . . ? 
H17 C22 H18 107.7 . . ? 
C24 C23 C25 114.0(3) . . ? 
C24 C23 H19 108.8 . . ? 
C25 C23 H19 108.8 . . ? 
C24 C23 H20 108.8 . . ? 
C25 C23 H20 108.8 . . ? 
H19 C23 H20 107.6 . . ? 
C23 C24 C18 114.6(3) . . ? 
C23 C24 H21 108.6 . . ? 
C18 C24 H21 108.6 . . ? 
C23 C24 H22 108.6 . . ? 
C18 C24 H22 108.6 . . ? 
H21 C24 H22 107.6 . . ? 
C23 C25 H23 109.5 . . ? 
C23 C25 H24 109.5 . . ? 
H23 C25 H24 109.5 . . ? 
C23 C25 H25 109.5 . . ? 
H23 C25 H25 109.5 . . ? 
H24 C25 H25 109.5 . . ? 
 
loop_ 
 _geom_torsion_atom_site_label_1 
 _geom_torsion_atom_site_label_2 
 _geom_torsion_atom_site_label_3 
 _geom_torsion_atom_site_label_4 
 _geom_torsion 
 _geom_torsion_site_symmetry_1 
 _geom_torsion_site_symmetry_2 
 _geom_torsion_site_symmetry_3 
 _geom_torsion_site_symmetry_4 
 _geom_torsion_publ_flag 
C10 S1 C5 C16 178.4(3) . . . . ? 
C10 S1 C5 C12 -1.4(3) . . . . ? 
C1 C1 C10 C8 0.8(5) 2_665 . . . ? 
C27 C1 C10 C8 -179.7(3) 2_665 . . . ? 
C1 C1 C10 S1 179.4(3) 2_665 . . . ? 
C27 C1 C10 S1 -1.1(5) 2_665 . . . ? 
C12 C8 C10 C1 179.4(3) . . . . ? 
C11 C8 C10 C1 -1.0(5) . . . . ? 
C12 C8 C10 S1 0.7(3) . . . . ? 
C11 C8 C10 S1 -179.8(2) . . . . ? 
C5 S1 C10 C1 -178.3(3) . . . . ? 
C5 S1 C10 C8 0.4(2) . . . . ? 
C1 C27 C11 C8 -0.5(5) 2_665 . . . ? 
C1 C27 C11 C14 -178.9(3) 2_665 . . . ? 
C12 C8 C11 C27 -179.8(3) . . . . ? 
C10 C8 C11 C27 0.8(4) . . . . ? 
C12 C8 C11 C14 -1.4(5) . . . . ? 
C10 C8 C11 C14 179.2(3) . . . . ? 
C10 C8 C12 C5 -1.8(4) . . . . ? 
C11 C8 C12 C5 178.7(3) . . . . ? 
C16 C5 C12 C8 -177.7(3) . . . . ? 
S1 C5 C12 C8 2.1(4) . . . . ? 
C27 C11 C14 C6 102.8(4) . . . . ? 
C8 C11 C14 C6 -75.5(4) . . . . ? 
C17 C6 C14 C11 -179.3(3) . . . . ? 
C17 C13 C15 C7 179.0(3) . . . . ? 
C22 C7 C15 C13 176.4(3) . . . . ? 
C12 C5 C16 C26 175.4(3) . . . . ? 
S1 C5 C16 C26 -4.4(5) . . . . ? 
C12 C5 C16 C21 -3.6(6) . . . . ? 
S1 C5 C16 C21 176.5(3) . . . . ? 
N2 C26 C16 C5 -23(6) . . . . ? 
N2 C26 C16 C21 156(6) . . . . ? 
C14 C6 C17 C13 -172.4(3) . . . . ? 
C15 C13 C17 C6 173.3(3) . . . . ? 
C22 C9 C18 C24 179.5(3) . . . . ? 
C5 C16 C21 N1 -134(48) . . . . ? 
C26 C16 C21 N1 47(48) . . . . ? 
C18 C9 C22 C7 177.3(3) . . . . ? 
C15 C7 C22 C9 179.4(3) . . . . ? 
C25 C23 C24 C18 -70.4(4) . . . . ? 
C9 C18 C24 C23 174.6(3) . . . . ? 
 
_diffrn_measured_fraction_theta_max    0.975 
_diffrn_reflns_theta_full              68.24 
_diffrn_measured_fraction_theta_full   0.975 
_refine_diff_density_max    0.463 
_refine_diff_density_min   -0.540 
_refine_diff_density_rms    0.089 
